# Supplementary material for: Global assessment of rural–urban interface in Portugal related to land cover changes
Source: Copernicus journal article supplement (doi:10.5194/nhess-18-1647-2018), 2018-06-13
Supplement: Supplementary file [file nhess-18-1647-2018-supplement-title-page.pdf › nhess-18-1647-2018-supplement-title-page.pdf]

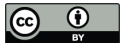

## *Supplement of*

# **Global assessment of rural–urban interface in Portugal related to land cover changes**

**Marj Tonini et al.**

*Correspondence to:* Marj Tonini ([marj.tonini@unil.ch](mailto:marj.tonini@unil.ch))

- nhess-18-1647-2018-supplement-title-page.pdf
- Cont\_Portugal.cpg
- Cont\_Portugal.dbf
- Cont\_Portugal.prj
- Cont\_Portugal.sbn
- Cont\_Portugal.sbx
- Cont\_Portugal.shp
- Cont\_Portugal.shp.xml
- Cont\_Portugal.shx
- RUI1990\_1km.cpg
- RUI1990\_1km.dbf
- RUI1990\_1km.prj
- RUI1990\_1km.sbn
- RUI1990\_1km.sbx
- RUI1990\_1km.shp
- RUI1990\_1km.shp.xml
- RUI1990\_1km.shx
- RUI2000\_1km.cpg
- RUI2000\_1km.dbf
- RUI2000\_1km.prj

- RUI2000\_1km.sbn
- RUI2000\_1km.sbx
- RUI2000\_1km.shp
- RUI2000\_1km.shp.xml
- RUI2000\_1km.shx
- RUI2006\_1km.cpg
- RUI2006\_1km.dbf
- RUI2006\_1km.prj
- RUI2006\_1km.sbn
- RUI2006\_1km.sbx
- RUI2006\_1km.shp
- RUI2006\_1km.shp.xml
- RUI2006\_1km.shx
- RUI2012\_1km.cpg
- RUI2012\_1km.dbf
- RUI2012\_1km.prj
- RUI2012\_1km.sbn
- RUI2012\_1km.sbx
- RUI2012\_1km.shp
- RUI2012\_1km.shp.xml
- RUI2012\_1km.shx

The copyright of individual parts of the supplement might differ from the CC BY 4.0 License.
